# Supplementary material for: The ten-year evolutionary trajectory of a highly recurrent paediatric high grade neuroepithelial tumour with MN1:BEND2 fusion
Source: PubMed Central journal article supplement (PMC5773598; doi:10.1038/s41598-018-19389-9), 2018-01-18

## **SUPPLEMENTARY INFORMATION**

for

**The ten-year evolutionary trajectory of a highly recurrent paediatric high grade neuroepithelial tumour with *MN1:BEND2* fusion**

*Anna Burford, Alan Mackay, Sergey Popov , Maria Vinci, Diana Carvalho, Matthew Clarke, Elisa Izquierdo, Aimee Avery, Thomas S Jacques, Wendy J Ingram, Andrew S Moore, Kieran Frawley, Timothy E Hassall, Thomas Robertson and Chris Jones*

**Supplementary Figure S1** – *FISH for MN1:BEND2 fusion in all recurrences.* FISH using probes directed against *MN1* (green) and *BEND2* (red), highlighting fusion signals in samples **A-K**.

*MN1:BEND2* fusion probes

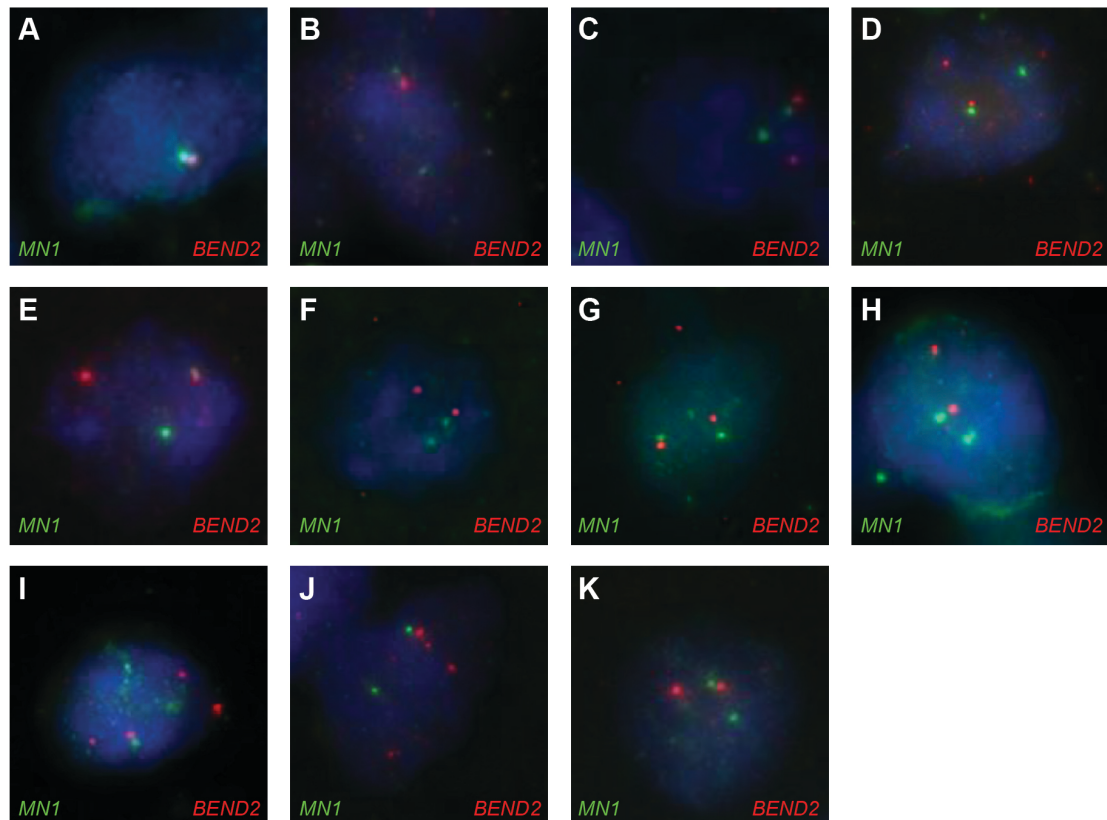

**Supplementary Figure S2 – Exome sequencing of all recurrences.** For each sample A-K, a CIRCOS plot is given highlighting somatic SNVs and InDels (outer ring), DNA copy number changes (red=gain, blue=loss) and loss of heterozygosity (yellow) on the inner rings, and inter-chromosomal translocations inside the circle (blue).

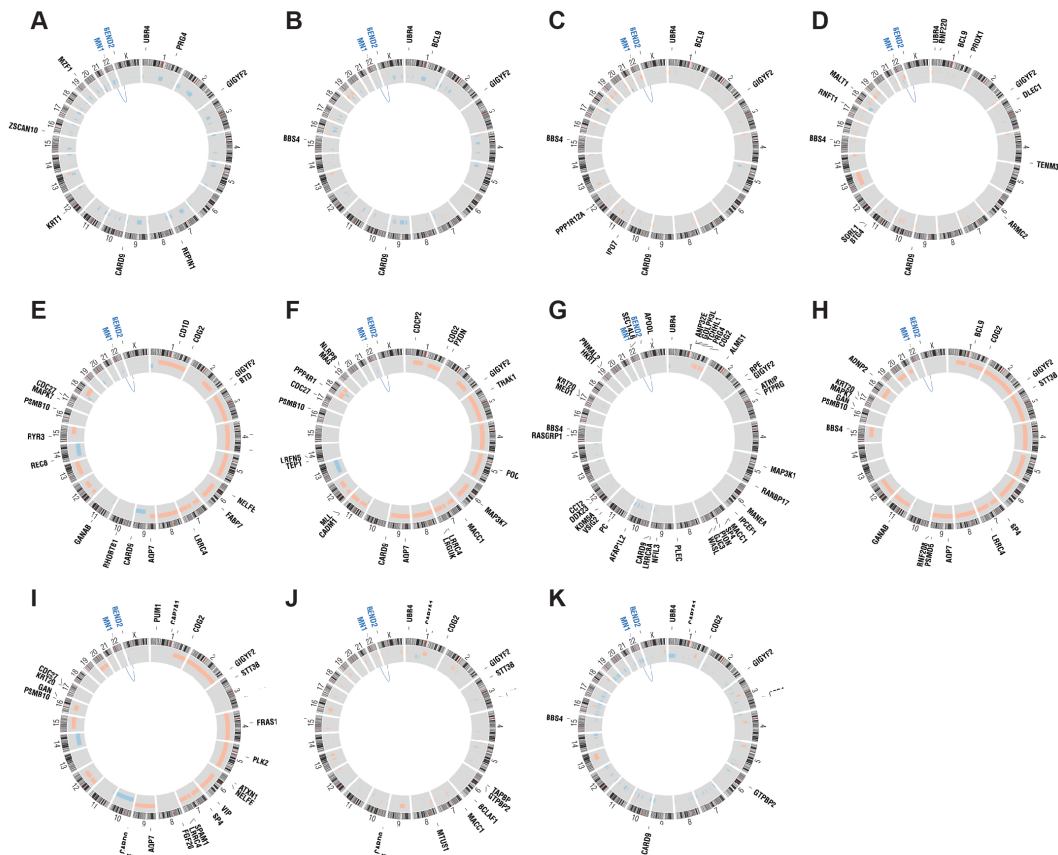

**Supplementary Figure S3 – Expression of *IL8* in HGNET-MN1.** (A) Boxplots of RNA sequencing data from the current reference case where available (E, F, H and I) compared with a published series of hemispheric high grade glioma (HGG)<sup>13</sup>. (B) Boxplots of Affymetrix U133Plus2.0 expression array data of a series of atypical teratoid / rhabdoid tumours (AT/RT), hemispheric high grade glioma (HGG), medulloblastoma (MG), RELA-fusion positive ependymoma (EPN-RELA) and HGNET-MN1<sup>8</sup>. \*\*\* $p < 0.0001$ , t-test

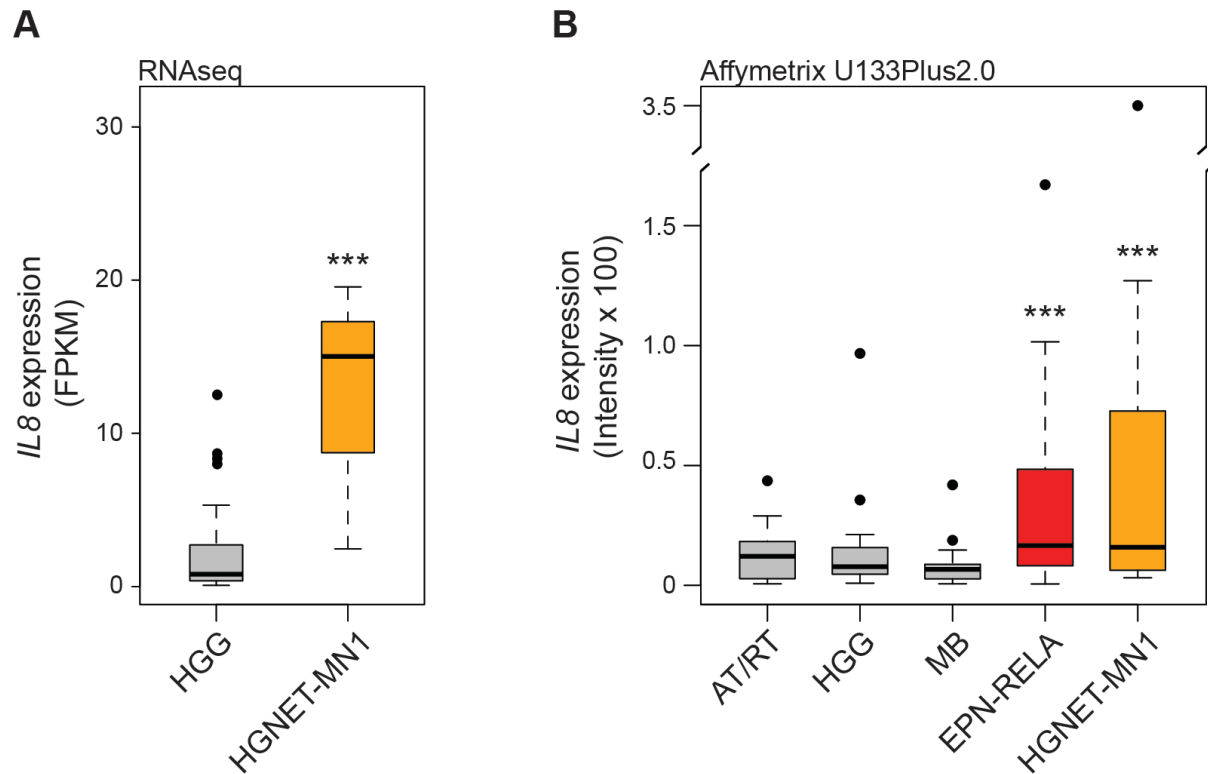

Supplement: 41598_2018_19389_MOESM1_ESM.pdf [file 41598_2018_19389_MOESM1_ESM.pdf]
